# Supplementary material for: Phylogenomic Comparison of Seven African Swine Fever Genotype II Outbreak Viruses (1998–2019) Reveals the Likely African Origin of Georgia 2007/1
Source: MDPI journal article supplement (doi:10.3390/pathogens12091129), 2023-09-04
Supplement: s1 [file s1]

**Supplementary Table S1.** Genome sequences included in this study and their corresponding GenBank accession numbers

| <b>Isolate Name</b>         | <b>Country of Origin</b> | <b>Year Isolated</b> | <b>GenBank Accession Number</b> |
|-----------------------------|--------------------------|----------------------|---------------------------------|
| Georgia/2007                | Georgia                  | 2007                 | FR682468.2                      |
| Tanzania/Rukwa/17/1         | Tanzania                 | 2017                 | LR813622                        |
| Tan/17/Kibaha               | Tanzania                 | 2017                 | ON409979                        |
| TAN/17/Mbagala              | Tanzania                 | 2017                 | ON409982                        |
| TAN/20/Morogoro             | Tanzania                 | 2020                 | ON4009983                       |
| MAL/19/Karonga              | Malawi                   | 2019                 | MW856068                        |
| Nigeria/RV502/2020          | Nigeria                  | 2020                 | OP672342                        |
| Primorsky19/WB-6723         | Russia                   | 2019                 | MW306191                        |
| Ulyanovsk19/WB-5699         | Russia                   | 2019                 | MW306192                        |
| Amur19/WB-6905              | Russia                   | 2019                 | MW306190                        |
| Kabardino-Balkaria19/WB-964 | Russia                   | 2019                 | MT459800                        |
| Kaliningrad 18/WB-9766      | Russia                   | 2018                 | OM966718                        |
| Kaliningrad 19/WB-10168     | Russia                   | 2019                 | OM966719                        |

**Supplementary Table S2.** Synonymous SNPs of seven ASFVs under study compared to Georgia 2007/1 (FR682468.2), Tanzania/Rukwa/17/1 (LR813622) and MAL/19/Karonga (MW856068) with nucleotide substitutions on amino acids highlighted in grey.

| ORF        | SNP/AA   | Georgia 2007/1<br>(FR682468.2) | MOZ/01/2005 | RSA/08/2019 | ZIM/2015 | MAL/04/2011 | MAU01/2007 | MAD/01/1998 | TAN /01/2011 | MAL/19/Karonga<br>(MW856068) | Tanzania/Rukwa/17/1<br>(LR813622) |
|------------|----------|--------------------------------|-------------|-------------|----------|-------------|------------|-------------|--------------|------------------------------|-----------------------------------|
| MGF360-3L  | G 95 G   | T                              | T           | T           | T        | T           | T          | T           | C            | C                            | C                                 |
| MGF360-4L  | Y 306 Y  | A                              | A           | A           | A        | A           | G          | G           | A            | A                            | A                                 |
| MGF360-9L  | G 79 G   | A                              | A           | A           | A        | G           | G          | G           | G            | G                            | G                                 |
| MGF360-10L | D 312 D  | G                              | G           | G           | G        | G           | A          | G           | G            | G                            | G                                 |
| MGF360-14L | L 223 L  | C                              | C           | C           | C        | T           | C          | C           | C            | C                            | C                                 |
| MGF505-6R  | E 328 E  | G                              | G           | G           | G        | G           | A          | G           | G            | G                            | G                                 |
| MGF505-6R  | R 424 R  | G                              | G           | G           | G        | A           | G          | G           | G            | G                            | G                                 |
| MGF505-7R  | L 27 L   | G                              | G           | G           | G        | A           | G          | G           | G            | G                            | G                                 |
| MGF360-15R | L 241 L  | C                              | C           | C           | C        | C           | T          | C           | C            | C                            | C                                 |
| MGF360-15R | N 253 N  | C                              | C           | C           | C        | C           | T          | C           | C            | C                            | C                                 |
| A179L      | F 199 F  | A                              | A           | A           | A        | A           | G          | G           | G            | G                            | G                                 |
| F334L      | Q 147 Q  | C                              | C           | C           | C        | C           | C          | C           | T            | T                            | T                                 |
| EP424R     | G 10 G   | G                              | G           | G           | G        | G           | G          | G           | A            | A                            | A                                 |
| EP152R     | H 126 H  | C                              | C           | C           | C        | C           | C          | C           | T            | T                            | T                                 |
| EP402R     | I 118 I  | C                              | T           | T           | T        | T           | T          | T           | T            | T                            | T                                 |
| M1249L     | P 124 P  | G                              | G           | G           | G        | G           | G          | G           | A            | A                            | A                                 |
| M1249L     | A 1046 A | T                              | T           | T           | T        | T           | T          | T           | G            | T                            | T                                 |
| C717R      | A 554 A  | C                              | C           | T           | C        | C           | C          | C           | C            | C                            | C                                 |



**Supplementary Table S3.** Non-synonymous SNPs identified between nine ASFV genotype IIs from Africa compared to Georgia 2007/1.

| ORF              | Position | Georgia 2007/1<br>(FR682468) | MOZ/01/2005 | RSA/08/2019 | ZIM/2015 | MAL/04/2011 | MAU/01/2007 | MAD/01/1998 | TAN /01/2011 | MAL /19/ Karonga<br>(MW856068) | Tanzania /Rukwa/17/1<br>(LR813622) |
|------------------|----------|------------------------------|-------------|-------------|----------|-------------|-------------|-------------|--------------|--------------------------------|------------------------------------|
| MGF360-3L        | 104      | C                            | C           | C           | C        | C           | C           | C           | Y            | Y                              | Y                                  |
| MGF110-1L        | 109      | W                            | W           | W           | W        | W           | W           | W           | R            | R                              | R                                  |
| MGF110-3L        | 91       | G                            | G           | G           | D        | G           | G           | G           | G            | G                              | G                                  |
| MGF110-4L        | 101      | D                            | D           | D           | E        | D           | D           | D           | D            | D                              | D                                  |
| MGF110-4L        | 17       | V                            | V           | V           | V        | V           | L           | L           | V            | V                              | V                                  |
| MGF110-5L-<br>6L | 35       | L                            | L           | L           | H        | L           | L           | L           | L            | L                              | L                                  |
| MGF110-5L-<br>6L | 164      | S                            | S           | S           | S        | S           | S           | S           | -            | -                              | -                                  |
| MGF110-8L        | 1        | V                            | V           | V           | V        | V           | V           | V           | M            | M                              | M                                  |
| MGF110-8L        | 81       | T                            | T           | T           | T        | T           | T           | T           | M            | M                              | M                                  |
| MGF110-8L        | 94       | G                            | G           | G           | G        | G           | G           | G           | I            | I                              | I                                  |
| MGF110-13LB      | 115      | Q                            | Q           | Q           | Q        | R           | Q           | Q           | Q            | Q                              | Q                                  |
| MGF110-13LB      | 102      | L                            | L           | L           | L        | S           | L           | L           | L            | L                              | L                                  |
| MGF360-6L        | 318      | L                            | L           | L           | L        | F           | L           | L           | L            | L                              | L                                  |
| MGF360-12L       | 35       | D                            | D           | D           | D        | N           | D           | D           | D            | D                              | D                                  |
| MGF360-13L       | 177      | G                            | G           | G           | D        | D           | D           | D           | D            | D                              | D                                  |
| MGF360-14L       | 351      | P                            | P           | P           | P        | P           | L           | L           | P            | P                              | P                                  |
| MGF505-4R        | 231      | P                            | P           | P           | P        | P           | L           | L           | L            | L                              | L                                  |
| MGF505-4R        | 321      | I                            | I           | I           | N        | I           | I           | I           | I            | I                              | I                                  |

|            |      |   |   |   |   |   |   |   |   |   |   |
|------------|------|---|---|---|---|---|---|---|---|---|---|
| MGF505-7R  | 249  | P | P | P | L | P | P | P | P | P | P |
| MGF505-9R  | 39   | R | R | R | R | Q | R | R | R | R | R |
| MGF360-15R | 178  | A | A | A | A | A | V | A | A | A | A |
| A238L      | 41   | C | C | C | C | C | C | C | Y | Y | Y |
| A238L      | 53   | C | C | C | C | C | C | C | Y | Y | Y |
| A859L      | 427  | A | A | A | E | E | E | E | E | E | E |
| F317L      | 230  | R | R | R | R | R | R | R | H | H | H |
| F778L      | 447  | A | A | A | A | A | A | A | V | V | V |
| EP402R     | 201  | T | T | T | I | T | T | T | T | T | T |
| C257L      | 78   | T | T | T | T | T | T | T | M | M | M |
| B169L      | 151  | D | D | N | D | D | D | D | D | D | D |
| G1340L     | 808  | S | S | S | N | S | S | S | S | S | S |
| G1211R     | 108  | V | V | I | V | V | V | V | V | V | V |
| G1211R     | 1002 | N | N | N | N | I | I | I | I | I | I |
| CP2475L    | 1566 | S | S | G | S | S | S | S | S | S | S |
| D345L      | 288  | M | M | M | M | M | M | M | T | T | T |
| H339R      | 68   | M | M | I | M | M | M | M | M | M | M |
| H339R      | 121  | S | S | N | S | S | S | S | S | S | S |
| QP509L     | 351  | L | L | L | D | L | L | L | L | L | L |
| E183L      | 173  | N | N | N | N | N | N | N | S | N | N |
| E199L      | 125  | E | E | V | E | E | E | E | E | E | E |
| E199L      | 104  | Q | Q | Q | H | Q | Q | Q | Q | Q | Q |
| E165R      | 130  | D | D | D | D | D | D | D | N | N | N |
| I267L      | 129  | I | I | I | I | I | V | V | V | V | V |
| I215L      | 173  | A | A | V | A | A | A | A | A | A | A |

|             |     |   |   |   |   |   |   |   |   |   |   |
|-------------|-----|---|---|---|---|---|---|---|---|---|---|
| I215L       | 4   | R | R | R | R | G | R | R | R | R | R |
| I196L       | 122 | T | T | T | T | A | T | T | T | T | T |
| I196L       | 50  | S | S | S | S | N | S | S | S | S | S |
| MGF505-11L  | 83  | A | A | A | A | A | A | A | T | T | T |
| MGF505-11L  | 334 | L | L | L | L | P | P | P | P | P | P |
| MGF100-3L   | 85  | D | D | D | G | D | D | D | D | D | D |
| I10L        | 40  | C | C | C | C | C | C | C | Y | Y | Y |
| MGF360-19Rb | 42  | I | I | I | I | T | I | I | I | I | I |

**Supplementary Table S4.** SNPs observed within the intergenic regions of the nine African Isolates and Georgia 2007/1 with differences highlighted in grey.

| Position | IGR                       | Georgia 2007/1<br>(FR682468.2) | MOZ/01/2005 | RSA/08/2019 | ZIM/2015 | MAL/04/2011 | MAU/01/2007 | MAD/01/1998 | TAN /01/2011 | MAL/19/Karonga<br>(MW856068) | Tanzania/Rukwa/17/1<br>(LR813622) |
|----------|---------------------------|--------------------------------|-------------|-------------|----------|-------------|-------------|-------------|--------------|------------------------------|-----------------------------------|
| 5440     | MGF110 4L / 5L            | C                              | C           | C           | C        | C           | C           | C           | T            | T                            | T                                 |
| 21151    | MGF360-8L / 9L            | A                              | A           | A           | A        | A           | A           | A           | -            | -                            | -                                 |
| 24553    | MGF360-11L /<br>MGF505-1R | C                              | C           | T           | C        | C           | C           | C           | C            | C                            | C                                 |
| 169470   | I73R / I329L              | -                              | -           | -           | -        | -           | G           | -           | -            | -                            | -                                 |
| 169471   | I73R / I329L              | -                              | -           | -           | -        | -           | A           | -           | -            | -                            | -                                 |
| 169472   | I73R / I329L              | -                              | -           | -           | -        | -           | A           | -           | -            | -                            | -                                 |
| 169473   | I73R / I329L              | -                              | -           | -           | -        | -           | T           | -           | -            | -                            | -                                 |
| 169474   | I73R / I329L              | -                              | -           | -           | -        | -           | A           | -           | -            | -                            | -                                 |
| 169475   | I73R / I329L              | -                              | -           | -           | -        | -           | T           | -           | -            | -                            | -                                 |
| 169476   | I73R / I329L              | -                              | -           | -           | -        | -           | A           | -           | -            | -                            | -                                 |
| 169477   | I73R / I329L              | -                              | -           | -           | -        | -           | T           | -           | -            | -                            | -                                 |
| 169478   | I73R / I329L              | -                              | -           | -           | -        | -           | A           | -           | -            | -                            | -                                 |
| 169479   | I73R / I329L              | -                              | -           | -           | -        | -           | G           | -           | -            | -                            | -                                 |
| 179683   | I73R / I329L              | -                              | -           | -           | -        | -           | A           | -           | -            | -                            | -                                 |
| 179684   | I73R / I329L              | -                              | -           | -           | -        | -           | T           | -           | -            | -                            | -                                 |
| 179704   | I73R / I329L              | G                              | G           | G           | G        | G           | G           | G           | A            | A                            | A                                 |
| 179932   | I329L / I 215L            | -                              | -           | -           | -        | -           | -           | -           | A            | A                            | A                                 |

---

|        |                       |   |   |   |   |   |   |   |   |   |   |
|--------|-----------------------|---|---|---|---|---|---|---|---|---|---|
| 181961 | DP96R /<br>MGF360-19R | - | - | - | - | - | A | A | A | A | A |
|--------|-----------------------|---|---|---|---|---|---|---|---|---|---|

---
